# Supplementary material for: Burden of Stroke and its Risk Factors in China from 1990 to 2021: an Analysis for the Global Burden of Disease Study (GBD) 2021
Source: Research Square preprint supplement (doi:10.21203/rs.3.rs-5407803/v1), 2024-12-02
Supplement: Supplementary file 1 [file 205e6fa9a2ef69fdde770dee.xlsx]

## Sheet: Sheet1
Table 3. Stroke-related DALYs (absolute numbers and percentages in all age) associated with risk factors and their clusters in 2021
	Ischemic stroke				Intracerebral Hemorrhage				Subarachnoid hemorrhage
	Female		Male		Female		Male		Female		Male
	Number (millions)	Percentage(%)	Number (millions)	Percentage(%)	Number (millions)	Percentage(%)	Number (millions)	Percentage(%)	Number (millions)	Percentage(%)	Number (millions)	Percentage(%)
All risk factors	8.66 (6.99 to 10.64)	87.94 (80.51 to 93.12)	12.32 (9.8 to 15.13)	90.7 (85.34 to 94.71)	8.24 (6.37 to 10.51)	79.02 (69.7 to 86.55)	14.47 (11.15 to 18.76)	85 (78.58 to 90.34)	0.77 (0.55 to 1.05)	74.04 (62.66 to 83.17)	1 (0.62 to 1.4)	79.7 (71.55 to 86.24)
Behavioral risks	3.15 (1.75 to 4.68)	31.93 (18.46 to 44.82)	7.22 (5.2 to 9.73)	53.12 (41.19 to 64.31)	2.5 (0.77 to 4.45)	24.02 (6.71 to 40.13)	8.82 (5.72 to 12.45)	51.8 (37.7 to 64.37)	0.25 (0.06 to 0.45)	23.82 (5.07 to 40.61)	0.58 (0.33 to 0.89)	46.48 (31.39 to 59.79)
Alcohol use	0.11 (-0.02 to 0.29)	1.12 (-0.15 to 3.01)	1.43 (-0.25 to 3.56)	10.53 (-1.89 to 24.71)	0.12 (0 to 0.27)	1.14 (0.04 to 2.58)	1.94 (0.02 to 4.1)	11.42 (0.14 to 22.32)	No data	No data	No data	No data
Diet high in processed meat	0.03 (0.01 to 0.06)	0.33 (0.08 to 0.58)	0.04 (0.01 to 0.07)	0.28 (0.07 to 0.49)	No data	No data	No data	No data	No data	No data	No data	No data
Diet high in red meat	0.08 (-0.03 to 0.28)	0.78 (-0.32 to 2.94)	0.13 (-0.06 to 0.47)	0.94 (-0.48 to 3.42)	-0.93 (-3.87 to 1.29)	-8.78 (-35.86 to 12.4)	-1.75 (-7.28 to 2.39)	-10.32 (-42.09 to 14.35)	-0.11 (-0.46 to 0.15)	-10.43 (-42.19 to 14.44)	-0.15 (-0.59 to 0.19)	-11.64 (-46.76 to 16)
Diet high in sodium	1.4 (0.37 to 2.96)	14.18 (3.78 to 27.76)	2.63 (0.92 to 4.99)	19.35 (7.31 to 34.17)	1.64 (0.48 to 3.38)	15.71 (4.9 to 29.36)	3.55 (1.38 to 6.49)	20.81 (8.62 to 35.58)	0.17 (0.05 to 0.34)	16.43 (5.54 to 30.29)	0.26 (0.1 to 0.48)	20.81 (8.86 to 35.83)
Diet high in sugar to sweetened beverages	0.02 (0.01 to 0.03)	0.16 (0.08 to 0.26)	0.02 (0.01 to 0.03)	0.13 (0.07 to 0.21)	No data	No data	No data	No data	No data	No data	No data	No data
Diet low in fiber	0.08 (0 to 0.17)	0.76 (-0.02 to 1.63)	0.09 (0 to 0.22)	0.7 (-0.02 to 1.6)	0.18 (-0.05 to 0.44)	1.71 (-0.43 to 3.99)	0.3 (-0.07 to 0.75)	1.74 (-0.44 to 4.04)	0.02 (-0.01 to 0.06)	2.11 (-0.58 to 4.87)	0.03 (-0.01 to 0.06)	2.09 (-0.55 to 4.73)
Diet low in fruits	0.14 (0.06 to 0.24)	1.47 (0.65 to 2.36)	0.23 (0.11 to 0.38)	1.71 (0.89 to 2.63)	0.57 (-0.04 to 1.18)	5.42 (-0.37 to 10.53)	1.06 (-0.07 to 2.18)	6.25 (-0.41 to 11.91)	0.06 (0 to 0.13)	6.11 (-0.42 to 11.59)	0.09 (-0.01 to 0.18)	6.82 (-0.46 to 12.73)
Diet low in polyunsaturated fatty acids	0 (0 to 0)	0.02 (0.01 to 0.05)	0 (0 to 0.01)	0.03 (0.01 to 0.05)	No data	No data	No data	No data	No data	No data	No data	No data
Diet low in vegetables	0.01 (0 to 0.02)	0.08 (0 to 0.22)	0.01 (0 to 0.03)	0.1 (0.02 to 0.24)	0 (0 to 0)	0 (0 to 0)	0 (0 to 0)	0 (0 to 0)	0 (0 to 0)	0 (0 to 0)	0 (0 to 0)	0 (0 to 0)
Diet low in whole grains	0.4 (-0.39 to 1.12)	4.04 (-3.92 to 11.57)	0.66 (-0.67 to 1.93)	4.85 (-4.94 to 13.27)	No data	No data	No data	No data	No data	No data	No data	No data
Low physical activity	0.55 (0.11 to 1.14)	5.59 (1.06 to 10.88)	0.54 (0.12 to 1.07)	3.93 (0.89 to 7.5)	No data	No data	No data	No data	No data	No data	No data	No data
Secondhand smoke	0.66 (0.43 to 0.94)	6.67 (4.51 to 8.85)	0.51 (0.31 to 0.74)	3.74 (2.5 to 5.1)	0.8 (0.52 to 1.13)	7.71 (5.28 to 10.11)	0.69 (0.41 to 1.02)	4.02 (2.73 to 5.42)	0.09 (0.05 to 0.12)	8.24 (5.74 to 10.79)	0.05 (0.03 to 0.08)	4.15 (2.81 to 5.65)
Smoking	0.35 (0.25 to 0.49)	3.57 (2.62 to 4.7)	3.56 (2.73 to 4.62)	26.23 (22.52 to 29.93)	0.36 (0.26 to 0.51)	3.48 (2.62 to 4.39)	5.3 (4 to 6.87)	31.1 (27.31 to 34.88)	0.04 (0.02 to 0.05)	3.54 (2.71 to 4.42)	0.4 (0.25 to 0.57)	32.18 (28.34 to 35.93)
Environmental/occupational risks	3.95 (2.84 to 5.22)	40.07 (31.77 to 48.73)	5.58 (3.91 to 7.43)	41.08 (32.13 to 50.29)	4.3 (2.99 to 5.9)	41.13 (32.73 to 49.84)	7.04 (4.87 to 9.64)	41.34 (32.45 to 50.67)	0.42 (0.27 to 0.6)	40.54 (32.12 to 49.11)	0.51 (0.3 to 0.75)	40.71 (31.67 to 49.71)
Particulate matter pollution	3.03 (2.2 to 4.01)	30.8 (24.21 to 38.64)	4.06 (2.88 to 5.54)	29.91 (23.61 to 37.71)	3.23 (2.26 to 4.5)	30.89 (24.02 to 38.97)	5.04 (3.54 to 7.04)	29.63 (23.16 to 37.75)	0.32 (0.21 to 0.48)	31.12 (24.28 to 39.12)	0.37 (0.22 to 0.55)	29.65 (22.94 to 37.63)
High temperature	0.04 (-0.03 to 0.16)	0.41 (-0.25 to 1.56)	0.06 (-0.04 to 0.24)	0.46 (-0.28 to 1.72)	0.06 (-0.03 to 0.21)	0.52 (-0.29 to 1.92)	0.1 (-0.05 to 0.35)	0.57 (-0.29 to 2.07)	0 (0 to 0.02)	0.44 (-0.27 to 1.61)	0.01 (0 to 0.02)	0.51 (-0.27 to 1.88)
Low temperature	0.62 (0.49 to 0.8)	6.28 (5.55 to 7.14)	0.92 (0.71 to 1.19)	6.77 (6.04 to 7.63)	0.8 (0.62 to 1.03)	7.62 (6.97 to 8.47)	1.29 (1 to 1.68)	7.6 (6.95 to 8.43)	0.07 (0.05 to 0.1)	6.96 (6.12 to 7.88)	0.09 (0.05 to 0.13)	7.25 (6.44 to 8.16)
Lead exposure	0.73 (-0.1 to 1.68)	7.32 (-0.95 to 16.31)	1.3 (-0.17 to 2.89)	9.51 (-1.27 to 21.06)	0.78 (-0.1 to 1.83)	7.42 (-0.96 to 16.66)	1.6 (-0.19 to 3.56)	9.39 (-1.25 to 20.82)	0.07 (-0.01 to 0.17)	6.99 (-0.89 to 15.78)	0.11 (-0.01 to 0.25)	8.86 (-1.17 to 19.72)
Metabolic risks	7.63 (5.98 to 9.71)	77.52 (65.54 to 86.74)	10.42 (7.82 to 13.27)	76.71 (64.14 to 85.75)	6.65 (4.82 to 8.83)	63.72 (49.18 to 75.07)	10.6 (7.28 to 14.44)	62.21 (49.57 to 73.61)	0.58 (0.39 to 0.83)	56.33 (39.88 to 69.02)	0.7 (0.4 to 1.05)	55.26 (40.76 to 67.74)
High body to mass index	0.57 (0.08 to 1.13)	5.76 (0.86 to 11.11)	0.62 (0.09 to 1.27)	4.57 (0.65 to 8.76)	0.34 (0 to 0.87)	3.3 (0 to 8.05)	0.4 (-0.01 to 1.02)	2.33 (-0.03 to 5.9)	0.04 (0 to 0.1)	4.08 (0 to 9.83)	0.04 (0 to 0.09)	2.83 (-0.03 to 6.92)
High fasting plasma glucose	1.64 (1.19 to 2.19)	16.69 (13.2 to 20.94)	2.28 (1.66 to 3)	16.81 (13.18 to 20.85)	0.59 (0.29 to 0.96)	5.7 (2.94 to 8.62)	0.95 (0.47 to 1.53)	5.56 (2.9 to 8.59)	No data	No data	No data	No data
High LDL cholesterol	2.9 (0.98 to 4.93)	29.47 (9.87 to 48.11)	3.95 (1.38 to 6.62)	29.07 (9.95 to 47.3)	No data	No data	No data	No data	No data	No data	No data	No data
High systolic blood pressure	5.71 (4.04 to 7.63)	57.98 (41 to 70.85)	7.79 (5.23 to 10.55)	57.31 (41.99 to 70.66)	6 (4.04 to 8.08)	57.54 (40.44 to 70.59)	9.62 (6.29 to 13.37)	56.47 (41.43 to 69.31)	0.58 (0.38 to 0.82)	55.64 (39.3 to 68.79)	0.69 (0.4 to 1.04)	54.75 (39.75 to 67.15)
Kidney dysfunction	0.85 (0.55 to 1.19)	8.61 (5.91 to 11.37)	1.03 (0.69 to 1.46)	7.57 (5.39 to 9.84)	0.91 (0.61 to 1.27)	8.77 (6.3 to 11.33)	1.3 (0.87 to 1.81)	7.63 (5.68 to 9.74)	No data	No data	No data	No data
