# Supplementary material for: Burden of Stroke and its Risk Factors in China from 1990 to 2021: an Analysis for the Global Burden of Disease Study (GBD) 2021
Source: Research Square preprint supplement (doi:10.21203/rs.3.rs-5407803/v1), 2024-12-02
Supplement: Supplementary file 2 [file 7a7ed4027a0b291d1e957a89.xlsx]

## Sheet: Sheet1
Table 1. Millions of incident, prevalent, and fatal cases and disability-adjusted life-years of total stroke and stroke subtypes in China in 1990 and 2019, with percentage changes from 1990 to 2019
Disease	Gender	Incidence 1990	Incidence 2021	Incidence change, %	Prevalence 1990	Prevalence 2021	Prevalence change, %	Mortality 1990	Mortality 2021	Mortality change, %	DALYs 1990	DALYs 2021	DALYs change, %
All stroke	Both	1.69 (1.51 to 1.9)	4.09 (3.59 to 4.7)	142.65 (126.39 to 158.93)	10.73 (10 to 11.54)	26.34 (24.15 to 28.63)	145.41 (136.48 to 155.1)	1.53 (1.33 to 1.72)	2.59 (2.18 to 3.03)	69.32 (38.91 to 108.37)	38.00 (33.43 to 42.84)	53.19 (45.11 to 61.96)	39.96 (15.37 to 70.77)
	Women	0.79 (0.7 to 0.88)	1.78 (1.56 to 2.03)	127.16 (111.56 to 143.42)	5.41 (5.04 to 5.83)	12.62 (11.45 to 13.79)	133.21 (122.38 to 144.07)	0.73 (0.62 to 0.86)	1.09 (0.85 to 1.34)	47.98 (16.15 to 92.33)	17.39 (14.75 to 20.54)	21.33 (17.39 to 25.77)	22.65 (-3.84 to 57.5)
	Men	0.9 (0.8 to 1.03)	2.31 (2.02 to 2.66)	156.17 (137.37 to 175.17)	5.32 (4.95 to 5.76)	13.72 (12.62 to 14.9)	157.81 (148.04 to 169.02)	0.8 (0.67 to 0.93)	1.51 (1.22 to 1.86)	88.97 (40.52 to 148.96)	20.61 (17.16 to 24.11)	31.86 (25.73 to 39.02)	54.57 (15.5 to 103.76)
Ischemic stroke	Both	0.76 (0.62 to 0.94)	2.77 (2.3 to 3.32)	264.17 (240.88 to 291.25)	6.58 (5.88 to 7.26)	20.8 (18.62 to 23)	216.3 (202.18 to 228.68)	0.43 (0.36 to 0.51)	1.18 (0.99 to 1.37)	175.01 (116.14 to 246.57)	9.93 (8.51 to 11.66)	23.43 (19.92 to 26.93)	136.05 (89.69 to 190.97)
	Women	0.36 (0.3 to 0.44)	1.22 (1.01 to 1.47)	238.11 (213.72 to 265.03)	3.39 (3.03 to 3.75)	10.18 (9.03 to 11.33)	200.31 (184.27 to 216.15)	0.21 (0.17 to 0.25)	0.5 (0.4 to 0.62)	142.8 (79.16 to 217.63)	4.66 (4.02 to 5.54)	9.85 (8.13 to 11.86)	111.15 (65.31 to 168.43)
	Men	0.4 (0.32 to 0.49)	1.55 (1.27 to 1.88)	287.85 (259.66 to 318.91)	3.19 (2.83 to 3.58)	10.62 (9.52 to 11.84)	233.31 (217.95 to 249.78)	0.22 (0.18 to 0.28)	0.67 (0.54 to 0.83)	205.12 (118.99 to 321.74)	5.26 (4.28 to 6.54)	13.58 (11 to 16.39)	158.11 (89.05 to 246.02)
Intracerebral hemorrhage	Both	0.77 (0.64 to 0.9)	1.17 (1 to 1.33)	51.59 (42.44 to 62.41)	3.12 (2.76 to 3.52)	4.39 (3.89 to 4.91)	40.78 (32.54 to 48.59)	0.91 (0.78 to 1.06)	1.32 (1.11 to 1.57)	44.89 (16.23 to 79.58)	22.78 (19.63 to 26.51)	27.46 (22.84 to 32.68)	20.57 (-2.98 to 50.66)
	Women	0.35 (0.29 to 0.41)	0.49 (0.42 to 0.57)	40.58 (30.81 to 51.58)	1.46 (1.3 to 1.65)	1.8 (1.61 to 2.01)	23.06 (14.71 to 31.01)	0.43 (0.36 to 0.53)	0.54 (0.42 to 0.68)	26.11 (-4.42 to 66.98)	10.11 (8.41 to 12.36)	10.44 (8.15 to 13)	3.26 (-21.74 to 37.78)
	Men	0.42 (0.35 to 0.49)	0.68 (0.58 to 0.78)	60.72 (50.6 to 73.54)	1.65 (1.47 to 1.86)	2.59 (2.27 to 2.92)	56.45 (47.18 to 65.74)	0.48 (0.39 to 0.58)	0.78 (0.61 to 0.97)	61.53 (18.68 to 116.76)	12.67 (10.24 to 15.32)	17.02 (13.36 to 21.35)	34.38 (-2.73 to 81.86)
Subarachnoid hemorrhage	Both	0.15 (0.13 to 0.18)	0.15 (0.13 to 0.17)	-3.6 (-11.38 to 3.77)	1.1 (0.96 to 1.24)	1.32 (1.18 to 1.48)	19.8 (14.43 to 25.17)	0.19 (0.09 to 0.25)	0.09 (0.07 to 0.12)	-51.58 (-68.15 to -13.71)	5.30 (2.79 to 6.81)	2.30 (1.73 to 2.85)	-56.65 (-70.18 to -28.03)
	Women	0.07 (0.06 to 0.09)	0.07 (0.06 to 0.08)	-8.51 (-15.75 to -1.74)	0.59 (0.52 to 0.66)	0.71 (0.63 to 0.79)	20.72 (15.01 to 26.28)	0.1 (0.04 to 0.13)	0.04 (0.03 to 0.06)	-56.4 (-72.68 to -19.97)	2.61 (1.27 to 3.29)	1.04 (0.75 to 1.37)	-60.27 (-74.08 to -30.75)
	Men	0.08 (0.07 to 0.09)	0.08 (0.07 to 0.09)	0.93 (-7.47 to 9.75)	0.52 (0.45 to 0.58)	0.61 (0.54 to 0.69)	18.76 (13.14 to 24.21)	0.09 (0.03 to 0.13)	0.05 (0.03 to 0.07)	-46.43 (-68.28 to 56.2)	2.68 (1.09 to 3.76)	1.26 (0.8 to 1.71)	-53.14 (-70.51 to 17.31)
