# Supplementary material for: Burden of Stroke and its Risk Factors in China from 1990 to 2021: an Analysis for the Global Burden of Disease Study (GBD) 2021
Source: Research Square preprint supplement (doi:10.21203/rs.3.rs-5407803/v1), 2024-12-02
Supplement: Supplementary file 3 [file f255ecb8f4a3cc0b9fd3a657.xlsx]

## Sheet: Sheet1
Table 2. Age-standardized incidence, prevalence, mortality, and disability-adjusted life-years rates (per 100 000 persons), for total stroke and stroke subtypes in China in 1990 and 2021 and the percentage change from 1990 to 2021
Disease	Gender	Incidence 1990	Incidence 2021	Incidence change, %	Prevalence 1990	Prevalence 2021	Prevalence change, %	Mortality 1990	Mortality 2021	Mortality change, %	DALYs 1990	DALYs 2021	DALYs change, %
All stroke	Both	226.9 (202.9 to 252.8)	204.8 (181 to 231.5)	-9.78 (-15.24 to -4.22)	1167 (1082 to 1263)	1301 (1201 to 1406)	11.48 (8.27 to 14.45)	242.2 (213.8 to 272.7)	138 (116.7 to 160.3)	-43.01 (-52.84 to -30.95)	4835 (4243 to 5419)	2648 (2253 to 3077)	-45.23 (-54.37 to -33.69)
	Women	204.6 (182.5 to 227.1)	170.1 (150.1 to 191.1)	-16.86 (-22.14 to -11.49)	1150 (1065 to 1242)	1218 (1115 to 1325)	5.98 (2.22 to 9.85)	214.1 (178.9 to 251.3)	103.7 (81.6 to 127.6)	-51.57 (-61.75 to -37.4)	4283 (3647 to 5018)	1991 (1622 to 2400)	-53.52 (-63.38 to -40.63)
	Men	251.6 (224.7 to 283)	240.9 (212 to 274.9)	-4.28 (-10.86 to 1.81)	1206 (1113 to 1315)	1386 (1283 to 1498)	14.93 (10.51 to 18.84)	284 (243.9 to 323.3)	186.8 (152.4 to 226.9)	-34.21 (-49 to -15.81)	5529 (4702 to 6366)	3445 (2818 to 4184)	-37.69 (-52.32 to -19.54)
Ischemic stroke	Both	100 (81.52 to 120.9)	135.8 (113.3 to 159.8)	35.72 (27.94 to 43.66)	759.2 (675.2 to 850.3)	1019 (918.5 to 1123)	34.2 (29.88 to 38.8)	75.22 (64.48 to 88.23)	64.47 (54.03 to 74.82)	-14.29 (-31.93 to 6.12)	1388 (1189 to 1621)	1181 (1010 to 1357)	-14.91 (-30.9 to 4.19)
	Women	91.25 (75.16 to 109)	114.9 (95.48 to 135.8)	25.95 (18.3 to 32.75)	746.6 (663.4 to 832.2)	966.6 (863.6 to 1070)	29.48 (24.6 to 34.5)	65.28 (54.24 to 78.46)	48.58 (38.15 to 59.77)	-25.58 (-44.28 to -3.44)	1221 (1047 to 1441)	921.9 (760.8 to 1108)	-24.5 (-40.3 to -4.48)
	Men	110.1 (89.54 to 134.2)	157.4 (130.6 to 188.9)	42.99 (33.6 to 53.91)	792.5 (699.3 to 895.4)	1072 (971.5 to 1186)	35.3 (28.93 to 42.63)	90.97 (75.13 to 111.3)	88.32 (71.73 to 107.2)	-2.91 (-27.65 to 30.44)	1620 (1340 to 1982)	1518 (1243 to 1819)	-6.25 (-29.93 to 24.17)
Intracerebral hemorrhage	Both	108.9 (91.66 to 124.9)	61.15 (52.98 to 69.06)	-43.86 (-46.71 to -40.53)	308.4 (274.5 to 348.3)	222.1 (200.1 to 246.5)	-27.98 (-30.64 to -25.31)	139.7 (121.1 to 162)	68.84 (57.61 to 81.17)	-50.71 (-60.31 to -39.87)	2830 (2442 to 3281)	1352 (1129 to 1601)	-52.24 (-61.24 to -41.1)
	Women	96.44 (81 to 111)	48.21 (41.31 to 55.25)	-50.02 (-52.75 to -46.8)	292.4 (260.4 to 328.9)	185.2 (167.3 to 205.9)	-36.67 (-39.16 to -33.97)	122.5 (102.4 to 150.7)	51.11 (39.7 to 63.79)	-58.28 (-68.27 to -45.06)	2461 (2053 to 3017)	969.2 (757.4 to 1206)	-60.62 (-70.07 to -47.83)
	Men	122.2 (103 to 141.8)	74.72 (64.17 to 84.32)	-38.87 (-42.12 to -34.92)	325 (288.6 to 366.4)	259.5 (231.5 to 290.7)	-20.15 (-23.6 to -16.9)	164.1 (136.3 to 192.2)	92.84 (74.42 to 113.3)	-43.42 (-57.01 to -26.06)	3270 (2701 to 3907)	1793 (1421 to 2224)	-45.17 (-59.35 to -27.02)
Subarachnoid hemorrhage	Both	17.96 (15.37 to 21.12)	7.811 (6.876 to 8.95)	-56.5 (-60.17 to -53.32)	107.9 (94.6 to 121.8)	68.88 (61.53 to 76.9)	-36.16 (-38.34 to -34.17)	27.29 (12.81 to 36.07)	4.718 (3.447 to 5.952)	-82.71 (-88.71 to -67.93)	616.8 (315.5 to 799.2)	115.5 (86.86 to 142.5)	-81.28 (-87.24 to -68.37)
	Women	16.88 (14.48 to 19.85)	6.948 (6.06 to 7.925)	-58.83 (-62.39 to -55.69)	117.9 (103.3 to 133.2)	73.21 (65.6 to 81.49)	-37.89 (-40.44 to -35.6)	26.35 (11.11 to 33.9)	4.018 (2.756 to 5.434)	-84.75 (-90.55 to -71.23)	600.9 (282.1 to 757.6)	99.7 (73.36 to 130.6)	-83.41 (-89.22 to -70.98)
	Men	19.35 (16.54 to 22.99)	8.777 (7.667 to 10.15)	-54.63 (-58.5 to -51.06)	97.58 (85.24 to 110.7)	64.32 (57.23 to 71.96)	-34.08 (-36.03 to -32.04)	28.91 (9.45 to 42.37)	5.677 (3.314 to 7.931)	-80.36 (-88.45 to -38.92)	639.1 (241.6 to 915.5)	133.4 (84.49 to 181.1)	-79.13 (-86.97 to -44.49)
